# Supplementary material for: BODIPY-based macromolecular photosensitizer with cation-enhanced antibacterial activity
Source: Royal Society of Chemistry journal article supplement (doi:10.1039/c4py00715h), 2014-10-06
Supplement: c4py00715h1.pdf [file c4py00715h1.pdf]

## Supporting Information

### **BODIPY-based Macromolecular Photosensitizer with Cation Enhanced Antibacterial Activity**

Zhentan Lu,<sup>a</sup> Xinge Zhang\*,<sup>a</sup> Yu Zhao,<sup>a</sup> Yinan Xue,<sup>a</sup> Tingting Zhai,<sup>a</sup> Zhongming Wu<sup>b</sup>  
and Chaoxing Li\*<sup>a</sup>

<sup>a</sup>Key Laboratory of Functional Polymer Materials Ministry of Education, Institute of  
Polymer Chemistry, Nankai University, 94# Weijin Road, Tianjin 300071, China.

E-mail: zhangxinge@nankai.edu.cn; lcx@nankai.edu.cn. Tel: +86-22-23501645; Fax:  
+86-22-23505598

<sup>b</sup>2011 Collaborative Innovation Center of Tianjin for Medical Epigenetics, Key  
Laboratory of Hormones and Development (Ministry of Health), Metabolic Diseases  
Hospital, Tianjin Medical University, Tianjin 300070, China.

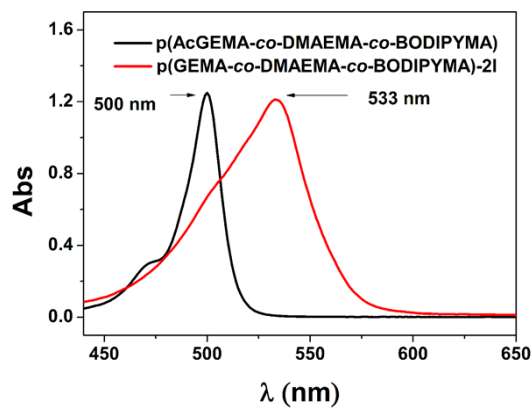

**Fig. S1** Absorption spectra of p(AcGEMA-*co*-DMAEMA-*co*-BODIPYMA) and p(GEMA-*co*-DMAEMA-*co*-BODIPYMA)-2I. CH<sub>2</sub>Cl<sub>2</sub> and H<sub>2</sub>O were used as solvent respectively.

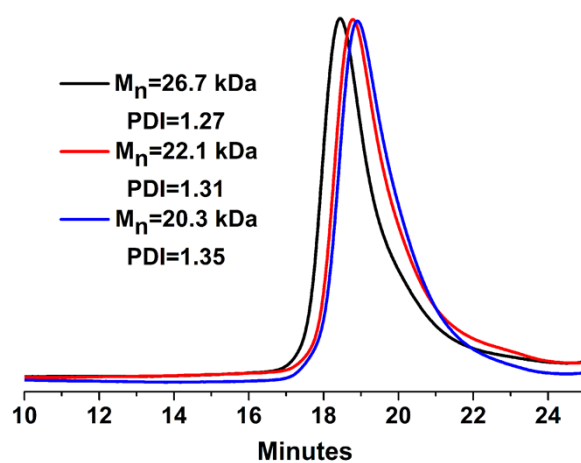

**Fig. S2** GPC profiles of p(AcGEMA-*co*-DMAEMA-*co*-BODIPYMA). THF as an eluent and polystyrene as a calibration standard.

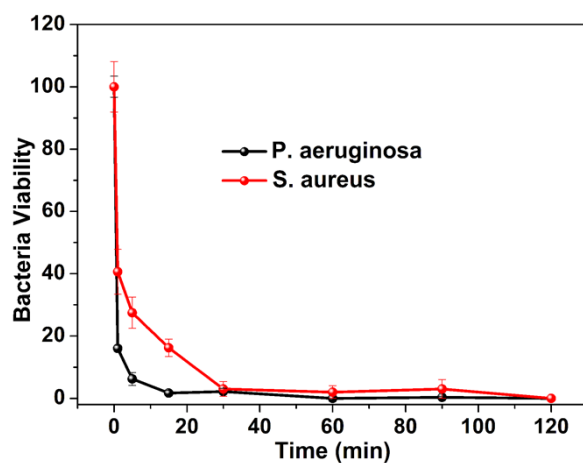

**Fig. S3** The effect of illumination time on antibacterial activity.

**Table S1.** MIC and cell viability comparison of P1, P2 and P3 with the reported data.

| Samples       | MIC (nmol/mL)          |                        | Cell viability<br>(100 nmol/mL) |
|---------------|------------------------|------------------------|---------------------------------|
|               | Gram-positive bacteria | Gram-negative bacteria |                                 |
| P1            | 5                      | 2.5                    | ~100                            |
| P2            | 0.3                    | 0.3                    | >80%                            |
| P3            | 0.3                    | 0.3                    | ~60                             |
| Reported data | 0.31                   | 1.25                   | >50%                            |

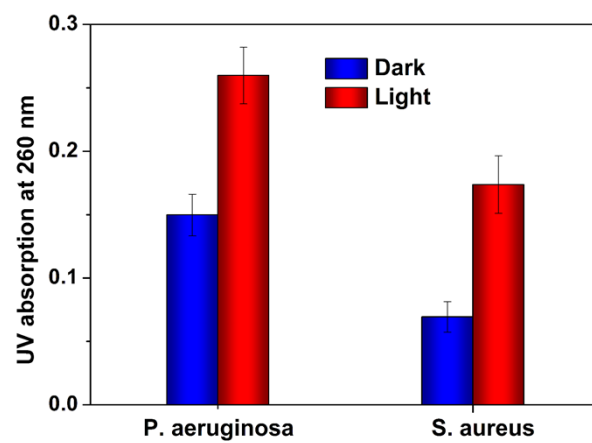

**Fig. S4** Absorption at 260 nm of *S. aureus* and *P. aeruginosa* under dark and light.
